# Supplementary material
Source: PubMed Central journal article supplement (PMC9112812)
Supplement: NIHMS1800328-supplement-1.pdf [file NIHMS1800328-supplement-1.pdf]

One-way Analysis of Variance (ANOVA)

The P value is < 0.0001, considered extremely significant.  
 Variation among column means is significantly greater than expected by chance.

Student-Newman-Keuls Multiple Comparisons Test

| <b>Comparison</b> | <b>Mean Difference</b> | <b>q</b> | <b>P value</b> |
|-------------------|------------------------|----------|----------------|
| wt wt vs het wt   | -146.45                | 11.976   | *** P<0.001    |
| wt wt vs het KO   | -121.02                | 10.395   | *** P<0.001    |
| wt wt vs wt KO    | -1.445                 | 0.1271   | ns P>0.05      |
| wt KO vs het wt   | -145.00                | 11.937   | *** P<0.001    |
| wt KO vs het KO   | -119.58                | 10.347   | *** P<0.001    |
| het KO vs het wt  | -25.427                | 2.050    | ns P>0.05      |

With Student-Newman-Keuls test, it is impossible to calculate confidence intervals.

Assumption test: Are the standard deviations of the groups equal?

ANOVA assumes that the data are sampled from populations with identical SDs. This assumption is tested using the method of Bartlett.

Bartlett statistic (corrected) = 38.404

The P value is < 0.0001.

Bartlett's test suggests that the differences among the SDs is extremely significant.

Since ANOVA assumes populations with equal SDs, you should consider transforming your data (reciprocal or log) or selecting a nonparametric test.

Assumption test: Are the data sampled from Gaussian distributions?

ANOVA assumes that the data are sampled from populations that follow Gaussian distributions. This assumption is tested using the method Kolmogorov and Smirnov:

| <b>Group</b> | <b>KS</b> | <b>P Value</b> | <b>Passed normality test?</b> |
|--------------|-----------|----------------|-------------------------------|
| wt wt        | 0.1298    | >0.10          | Yes                           |
| wt KO        | 0.3003    | <0.0001        | No                            |
| het wt       | 0.1597    | 0.0994         | Yes                           |
| het KO       | 0.1880    | 0.0083         | No                            |

At least one column failed the normality test with P<0.05.  
 Consider using a nonparametric test or transforming the data

(i.e. converting to logarithms or reciprocals).

Intermediate calculations. ANOVA table

| Source of variation          | Degrees of freedom | Sum of squares | Mean square |
|------------------------------|--------------------|----------------|-------------|
| Treatments (between columns) | 3                  | 526720         | 175573      |
| Residuals (within columns)   | 116                | 486902         | 4197.4      |
| Total                        | 119                | 1013622        |             |

$$F = 41.829 = (MS_{\text{treatment}}/MS_{\text{residual}})$$

Summary of Data

| Group  | Number of Points | Mean   | Standard Deviation | Standard Error of Mean | Median |
|--------|------------------|--------|--------------------|------------------------|--------|
| wt wt  | 32               | 128.31 | 26.087             | 4.612                  | 124.50 |
| wt KO  | 33               | 129.76 | 56.855             | 9.897                  | 120.00 |
| het wt | 25               | 274.76 | 84.881             | 16.976                 | 250.00 |
| het KO | 30               | 249.33 | 80.826             | 14.757                 | 222.50 |

| Group  | Minimum | Maximum | 95% Confidence Interval |        |
|--------|---------|---------|-------------------------|--------|
|        |         |         | From                    | To     |
| wt wt  | 94.000  | 186.00  | 118.91                  | 137.72 |
| wt KO  | 41.000  | 414.00  | 109.59                  | 149.93 |
| het wt | 168.00  | 464.00  | 239.72                  | 309.80 |
| het KO | 134.00  | 459.00  | 219.16                  | 279.51 |

\* \* \*

---

 One-way Analysis of Variance (ANOVA)
 

---

The P value is < 0.0001, considered extremely significant.  
 Variation among column means is significantly greater than expected by chance.

Student-Newman-Keuls Multiple Comparisons Test

| Comparison       | Mean Difference | q      | P value     |
|------------------|-----------------|--------|-------------|
| wt KO vs het wt  | -104.62         | 9.640  | *** P<0.001 |
| wt KO vs wt wt   | -16.008         | 1.967  | ns P>0.05   |
| wt KO vs het KO  | -6.777          | ---    | ns P>0.05   |
| het KO vs het wt | -97.846         | 10.200 | *** P<0.001 |
| het KO vs wt wt  | -9.231          | ---    | ns P>0.05   |
| wt wt vs het wt  | -88.616         | 9.058  | *** P<0.001 |

With Student-Newman-Keuls test, it is impossible to calculate confidence intervals.

Assumption test: Are the standard deviations of the groups equal?

ANOVA assumes that the data are sampled from populations with identical SDs. This assumption is tested using the method of Bartlett.

Bartlett's test can only be performed when every column has at least five values.

Assumption test: Are the data sampled from Gaussian distributions?

ANOVA assumes that the data are sampled from populations that follow Gaussian distributions. This assumption is tested using the method Kolmogorov and Smirnov:

| Group  | KS                      | P Value | Passed normality test? |
|--------|-------------------------|---------|------------------------|
| wt wt  | 0.2948                  | 0.0139  | No                     |
| wt KO  | 0.4486                  | 0.0014  | No                     |
| het wt | Too few values to test. |         |                        |
| het KO | 0.2627                  | 0.0218  | No                     |

At least one column failed the normality test with P<0.05.  
 Consider using a nonparametric test or transforming the data (i.e. converting to logarithms or reciprocals).

Intermediate calculations. ANOVA table

| Source of | Degrees of | Sum of | Mean |
|-----------|------------|--------|------|
|-----------|------------|--------|------|

| variation                    | freedom | squares | square |
|------------------------------|---------|---------|--------|
| Treatments (between columns) | 3       | 25674   | 8558.1 |
| Residuals (within columns)   | 26      | 11485   | 441.73 |
| Total                        | 29      | 37159   |        |

$$F = 19.374 = (MS_{\text{treatment}}/MS_{\text{residual}})$$

---

Summary of Data

---

| Group  | Number<br>of<br>Points | Mean   | Standard<br>Deviation | Standard<br>Error of<br>Mean | Median |
|--------|------------------------|--------|-----------------------|------------------------------|--------|
| wt wt  | 10                     | 27.661 | 27.123                | 8.577                        | 17.803 |
| wt KO  | 5                      | 11.653 | 10.568                | 4.726                        | 7.303  |
| het wt | 3                      | 116.28 | 36.031                | 20.802                       | 121.70 |
| het KO | 12                     | 18.431 | 12.866                | 3.714                        | 12.080 |

| Group  | Minimum | Maximum | 95% Confidence Interval |        |
|--------|---------|---------|-------------------------|--------|
|        |         |         | From                    | To     |
| wt wt  | 3.767   | 89.936  | 8.260                   | 47.063 |
| wt KO  | 6.157   | 30.530  | -1.466                  | 24.773 |
| het wt | 77.843  | 149.29  | 26.764                  | 205.79 |
| het KO | 6.454   | 42.297  | 10.256                  | 26.605 |

\* \* \*

---

 One-way Analysis of Variance (ANOVA)
 

---

The P value is 0.6955, considered not significant.  
 Variation among column means is not significantly greater than expected by chance.

Student-Newman-Keuls Multiple Comparisons Test

| Comparison       | Mean Difference | q     | P value   |
|------------------|-----------------|-------|-----------|
| het KO vs wt wt  | -4.520          | 1.548 | ns P>0.05 |
| het KO vs wt ko  | -2.851          | ---   | ns P>0.05 |
| het KO vs het wt | -0.9832         | ---   | ns P>0.05 |
| het wt vs wt wt  | -3.537          | ---   | ns P>0.05 |
| het wt vs wt ko  | -1.867          | ---   | ns P>0.05 |
| wt ko vs wt wt   | -1.670          | ---   | ns P>0.05 |

With Student-Newman-Keuls test, it is impossible to calculate confidence intervals.

Assumption test: Are the standard deviations of the groups equal?

ANOVA assumes that the data are sampled from populations with identical SDs. This assumption is tested using the method of Bartlett.

Bartlett statistic (corrected) = 5.141

The P value is 0.1617.

Bartlett's test suggests that the differences among the SDs is not significant.

Assumption test: Are the data sampled from Gaussian distributions?

ANOVA assumes that the data are sampled from populations that follow Gaussian distributions. This assumption is tested using the method Kolmogorov and Smirnov:

| Group  | KS     | P Value | Passed normality test? |
|--------|--------|---------|------------------------|
| wt wt  | 0.2498 | 0.0535  | Yes                    |
| wt ko  | 0.2713 | 0.0550  | Yes                    |
| het wt | 0.1605 | >0.10   | Yes                    |
| het KO | 0.2255 | >0.10   | Yes                    |

Intermediate calculations. ANOVA table

| Source of variation | Degrees of freedom | Sum of squares | Mean square |
|---------------------|--------------------|----------------|-------------|
| =====               | =====              | =====          | =====       |

|                              |    |        |        |
|------------------------------|----|--------|--------|
| Treatments (between columns) | 3  | 129.72 | 43.239 |
| Residuals (within columns)   | 39 | 3486.0 | 89.385 |
| -----                        |    |        |        |
| Total                        | 42 | 3615.7 |        |

$$F = 0.4837 = (MS_{\text{treatment}}/MS_{\text{residual}})$$

---

Summary of Data

---

| Group  | Number<br>of<br>Points | Mean   | Standard<br>Deviation | Standard<br>Error of<br>Mean | Median |
|--------|------------------------|--------|-----------------------|------------------------------|--------|
| wt wt  | 11                     | 52.846 | 13.286                | 4.006                        | 52.800 |
| wt ko  | 9                      | 51.177 | 7.195                 | 2.398                        | 49.140 |
| het wt | 13                     | 49.309 | 8.333                 | 2.311                        | 48.830 |
| het KO | 10                     | 48.326 | 7.253                 | 2.294                        | 49.325 |

| Group  | Minimum | Maximum | 95% Confidence Interval |        |
|--------|---------|---------|-------------------------|--------|
|        |         |         | From                    | To     |
| wt wt  | 34.530  | 85.240  | 43.921                  | 61.771 |
| wt ko  | 43.680  | 68.340  | 45.646                  | 56.707 |
| het wt | 32.110  | 59.140  | 44.273                  | 54.345 |
| het KO | 34.170  | 60.340  | 43.138                  | 53.514 |

\* \* \*

---

 One-way Analysis of Variance (ANOVA)
 

---

The P value is < 0.0001, considered extremely significant.  
 Variation among column means is significantly greater than expected by chance.

Student-Newman-Keuls Multiple Comparisons Test

| Comparison       | Mean Difference | q     | P value     |
|------------------|-----------------|-------|-------------|
| wt ko vs het wt  | -81.853         | 7.942 | *** P<0.001 |
| wt ko vs het KO  | -19.016         | 1.741 | ns P>0.05   |
| wt ko vs wt wt   | -14.081         | ---   | ns P>0.05   |
| wt wt vs het wt  | -67.772         | 6.961 | *** P<0.001 |
| wt wt vs het KO  | -4.935          | ---   | ns P>0.05   |
| het KO vs het wt | -62.837         | 6.286 | *** P<0.001 |

With Student-Newman-Keuls test, it is impossible to calculate confidence intervals.

Assumption test: Are the standard deviations of the groups equal?

ANOVA assumes that the data are sampled from populations with identical SDs. This assumption is tested using the method of Bartlett.

Bartlett statistic (corrected) = 15.233

The P value is 0.0016.

Bartlett's test suggests that the differences among the SDs is very significant.

Since ANOVA assumes populations with equal SDs, you should consider transforming your data (reciprocal or log) or selecting a nonparametric test.

Assumption test: Are the data sampled from Gaussian distributions?

ANOVA assumes that the data are sampled from populations that follow Gaussian distributions. This assumption is tested using the method Kolmogorov and Smirnov:

| Group  | KS     | P Value | Passed normality test? |
|--------|--------|---------|------------------------|
| wt wt  | 0.1274 | >0.10   | Yes                    |
| wt ko  | 0.2352 | >0.10   | Yes                    |
| het wt | 0.1772 | >0.10   | Yes                    |
| het KO | 0.2023 | >0.10   | Yes                    |

Intermediate calculations. ANOVA table

| Source of variation          | Degrees of freedom | Sum of squares | Mean square |
|------------------------------|--------------------|----------------|-------------|
| Treatments (between columns) | 3                  | 46717          | 15572       |
| Residuals (within columns)   | 39                 | 44058          | 1129.7      |
| Total                        | 42                 | 90776          |             |

$F = 13.785 = (MS_{\text{treatment}}/MS_{\text{residual}})$

#### Summary of Data

| Group  | Number of Points | Mean   | Standard Deviation | Standard Error of Mean | Median |
|--------|------------------|--------|--------------------|------------------------|--------|
| wt wt  | 11               | 88.499 | 15.576             | 4.696                  | 87.670 |
| wt ko  | 9                | 74.418 | 24.587             | 8.196                  | 64.330 |
| het wt | 13               | 156.27 | 51.084             | 14.168                 | 138.13 |
| het KO | 10               | 93.434 | 24.677             | 7.803                  | 87.490 |

| Group  | Minimum | Maximum | 95% Confidence Interval |        |
|--------|---------|---------|-------------------------|--------|
|        |         |         | From                    | To     |
| wt wt  | 61.000  | 111.50  | 78.035                  | 98.963 |
| wt ko  | 46.570  | 116.50  | 55.519                  | 93.317 |
| het wt | 97.250  | 253.75  | 125.40                  | 187.14 |
| het KO | 60.570  | 132.10  | 75.783                  | 111.09 |

\* \* \*



---

 One-way Analysis of Variance (ANOVA)
 

---

The P value is 0.0014, considered very significant.  
 Variation among column means is significantly greater than expected by chance.

Student-Newman-Keuls Multiple Comparisons Test

| Comparison       | Mean Difference | q     | P value     |
|------------------|-----------------|-------|-------------|
| het wt vs wt ko  | -5.012          | 5.917 | *** P<0.001 |
| het wt vs wt wt  | -3.265          | 4.080 | * P<0.05    |
| het wt vs het KO | -2.413          | 2.936 | * P<0.05    |
| het KO vs wt ko  | -2.599          | 2.896 | ns P>0.05   |
| het KO vs wt wt  | -0.8523         | ---   | ns P>0.05   |
| wt wt vs wt ko   | -1.747          | ---   | ns P>0.05   |

With Student-Newman-Keuls test, it is impossible to calculate confidence intervals.

Assumption test: Are the standard deviations of the groups equal?

ANOVA assumes that the data are sampled from populations with identical SDs. This assumption is tested using the method of Bartlett.

Bartlett statistic (corrected) = 6.228

The P value is 0.1010.

Bartlett's test suggests that the differences among the SDs is not significant.

Assumption test: Are the data sampled from Gaussian distributions?

ANOVA assumes that the data are sampled from populations that follow Gaussian distributions. This assumption is tested using the method Kolmogorov and Smirnov:

| Group  | KS     | P Value | Passed normality test? |
|--------|--------|---------|------------------------|
| wt wt  | 0.2286 | >0.10   | Yes                    |
| wt ko  | 0.2069 | >0.10   | Yes                    |
| het wt | 0.1427 | >0.10   | Yes                    |
| het KO | 0.2125 | >0.10   | Yes                    |

Intermediate calculations. ANOVA table

| Source of variation | Degrees of freedom | Sum of squares | Mean square |
|---------------------|--------------------|----------------|-------------|
| =====               | =====              | =====          | =====       |

|                              |    |        |        |
|------------------------------|----|--------|--------|
| Treatments (between columns) | 3  | 144.43 | 48.144 |
| Residuals (within columns)   | 39 | 297.61 | 7.631  |
| -----                        |    |        |        |
| Total                        | 42 | 442.05 |        |

$$F = 6.309 = (MS_{\text{treatment}}/MS_{\text{residual}})$$

---

Summary of Data

---

| Group  | Number<br>of<br>Points | Mean   | Standard<br>Deviation | Standard<br>Error of<br>Mean | Median |
|--------|------------------------|--------|-----------------------|------------------------------|--------|
| wt wt  | 11                     | 9.267  | 2.750                 | 0.8292                       | 8.720  |
| wt ko  | 9                      | 11.014 | 4.099                 | 1.366                        | 9.680  |
| het wt | 13                     | 6.002  | 2.092                 | 0.5801                       | 5.930  |
| het KO | 10                     | 8.415  | 1.974                 | 0.6242                       | 8.075  |

| Group  | Minimum | Maximum | 95% Confidence Interval |        |
|--------|---------|---------|-------------------------|--------|
|        |         |         | From                    | To     |
| wt wt  | 5.530   | 16.050  | 7.420                   | 11.115 |
| wt ko  | 6.510   | 17.340  | 7.864                   | 14.165 |
| het wt | 2.920   | 9.390   | 4.738                   | 7.266  |
| het KO | 5.930   | 13.080  | 7.003                   | 9.827  |

\* \* \*

---

 One-way Analysis of Variance (ANOVA)
 

---

The P value is 0.0331, considered significant.  
 Variation among column means is significantly greater than expected by chance.

Student-Newman-Keuls Multiple Comparisons Test

| Comparison       | Mean Difference | q     | P value   |
|------------------|-----------------|-------|-----------|
| wt wt vs Het wt  | -42.389         | 4.127 | * P<0.05  |
| wt wt vs het ko  | -27.500         | 2.514 | ns P>0.05 |
| wt wt vs wt ko   | -10.389         | ---   | ns P>0.05 |
| wt ko vs Het wt  | -32.000         | 3.211 | ns P>0.05 |
| wt ko vs het ko  | -17.111         | ---   | ns P>0.05 |
| het ko vs Het wt | -14.889         | ---   | ns P>0.05 |

With Student-Newman-Keuls test, it is impossible to calculate confidence intervals.

Assumption test: Are the standard deviations of the groups equal?

ANOVA assumes that the data are sampled from populations with identical SDs. This assumption is tested using the method of Bartlett.

Bartlett statistic (corrected) = 26.696

The P value is < 0.0001.

Bartlett's test suggests that the differences among the SDs is extremely significant.

Since ANOVA assumes populations with equal SDs, you should consider transforming your data (reciprocal or log) or selecting a nonparametric test.

Assumption test: Are the data sampled from Gaussian distributions?

ANOVA assumes that the data are sampled from populations that follow Gaussian distributions. This assumption is tested using the method Kolmogorov and Smirnov:

| Group  | KS     | P Value | Passed normality test? |
|--------|--------|---------|------------------------|
| wt wt  | 0.5132 | <0.0001 | No                     |
| wt ko  | 0.3242 | 0.0070  | No                     |
| Het wt | 0.2031 | >0.10   | Yes                    |
| het ko | 0.2465 | >0.10   | Yes                    |

At least one column failed the normality test with P<0.05.  
 Consider using a nonparametric test or transforming the data

(i.e. converting to logarithms or reciprocals).

Intermediate calculations. ANOVA table

| Source of variation          | Degrees of freedom | Sum of squares | Mean square |
|------------------------------|--------------------|----------------|-------------|
| Treatments (between columns) | 3                  | 8934.8         | 2978.3      |
| Residuals (within columns)   | 29                 | 25914          | 893.58      |
| Total                        | 32                 | 34849          |             |

$$F = 3.333 = (MStreatment/MSresidual)$$

Summary of Data

| Group  | Number of Points | Mean   | Standard Deviation | Standard Error of Mean | Median |
|--------|------------------|--------|--------------------|------------------------|--------|
| wt wt  | 8                | 1.500  | 4.243              | 1.500                  | 0.000  |
| wt ko  | 9                | 11.889 | 16.190             | 5.397                  | 0.000  |
| Het wt | 9                | 43.889 | 42.557             | 14.186                 | 35.000 |
| het ko | 7                | 29.000 | 39.162             | 14.802                 | 15.000 |

| Group  | Minimum | Maximum | 95% Confidence Interval |        |
|--------|---------|---------|-------------------------|--------|
|        |         |         | From                    | To     |
| wt wt  | 0.000   | 12.000  | -2.048                  | 5.048  |
| wt ko  | 0.000   | 40.000  | -0.5557                 | 24.333 |
| Het wt | 0.000   | 112.00  | 11.177                  | 76.601 |
| het ko | 0.000   | 108.00  | -7.220                  | 65.220 |

\* \* \*

---

 One-way Analysis of Variance (ANOVA)
 

---

The P value is < 0.0001, considered extremely significant.  
 Variation among column means is significantly greater than expected by chance.

Student-Newman-Keuls Multiple Comparisons Test

| Comparison       | Mean Difference | q     | P value     |
|------------------|-----------------|-------|-------------|
| wt Ko vs het wt  | -109.44         | 8.927 | *** P<0.001 |
| wt Ko vs het KO  | -35.095         | 2.678 | ns P>0.05   |
| wt Ko vs wt wt   | -4.667          | ---   | ns P>0.05   |
| wt wt vs het wt  | -104.78         | 8.291 | *** P<0.001 |
| wt wt vs het KO  | -30.429         | ---   | ns P>0.05   |
| het KO vs het wt | -74.349         | 5.673 | *** P<0.001 |

With Student-Newman-Keuls test, it is impossible to calculate confidence intervals.

Assumption test: Are the standard deviations of the groups equal?

ANOVA assumes that the data are sampled from populations with identical SDs. This assumption is tested using the method of Bartlett.

Bartlett statistic (corrected) = 12.826

The P value is 0.0050.

Bartlett's test suggests that the differences among the SDs is very significant.

Since ANOVA assumes populations with equal SDs, you should consider transforming your data (reciprocal or log) or selecting a nonparametric test.

Assumption test: Are the data sampled from Gaussian distributions?

ANOVA assumes that the data are sampled from populations that follow Gaussian distributions. This assumption is tested using the method Kolmogorov and Smirnov:

| Group  | KS     | P Value | Passed normality test? |
|--------|--------|---------|------------------------|
| wt wt  | 0.1852 | >0.10   | Yes                    |
| wt Ko  | 0.1554 | >0.10   | Yes                    |
| het wt | 0.2090 | >0.10   | Yes                    |
| het KO | 0.2768 | >0.10   | Yes                    |

Intermediate calculations. ANOVA table

| Source of variation          | Degrees of freedom | Sum of squares | Mean square |
|------------------------------|--------------------|----------------|-------------|
| Treatments (between columns) | 3                  | 67877          | 22626       |
| Residuals (within columns)   | 29                 | 39229          | 1352.7      |
| Total                        | 32                 | 107106         |             |

$F = 16.726 = (MS_{\text{treatment}}/MS_{\text{residual}})$

#### Summary of Data

| Group  | Number of Points | Mean   | Standard Deviation | Standard Error of Mean | Median |
|--------|------------------|--------|--------------------|------------------------|--------|
| wt wt  | 8                | 91.000 | 12.259             | 4.334                  | 90.500 |
| wt Ko  | 9                | 86.333 | 27.436             | 9.145                  | 84.000 |
| het wt | 9                | 195.78 | 39.701             | 13.234                 | 205.00 |
| het KO | 7                | 121.43 | 57.076             | 21.573                 | 118.00 |

| Group  | Minimum | Maximum | 95% Confidence Interval |        |
|--------|---------|---------|-------------------------|--------|
|        |         |         | From                    | To     |
| wt wt  | 76.000  | 112.00  | 80.750                  | 101.25 |
| wt Ko  | 47.000  | 129.00  | 65.244                  | 107.42 |
| het wt | 138.00  | 252.00  | 165.26                  | 226.29 |
| het KO | 61.000  | 236.00  | 68.641                  | 174.22 |

\* \* \*

---

 One-way Analysis of Variance (ANOVA)
 

---

The P value is 0.0893, considered not quite significant.  
 Variation among column means is not significantly greater than expected by chance.

Student-Newman-Keuls Multiple Comparisons Test

| Comparison       | Mean Difference | q     | P value   |
|------------------|-----------------|-------|-----------|
| het wt vs wt wt  | -20.323         | 3.631 | ns P>0.05 |
| het wt vs wt Ko  | -10.177         | ---   | ns P>0.05 |
| het wt vs het KO | -4.566          | ---   | ns P>0.05 |
| het KO vs wt wt  | -15.757         | ---   | ns P>0.05 |
| het KO vs wt Ko  | -5.612          | ---   | ns P>0.05 |
| wt Ko vs wt wt   | -10.145         | ---   | ns P>0.05 |

With Student-Newman-Keuls test, it is impossible to calculate confidence intervals.

Assumption test: Are the standard deviations of the groups equal?

ANOVA assumes that the data are sampled from populations with identical SDs. This assumption is tested using the method of Bartlett.

Bartlett statistic (corrected) = 11.263

The P value is 0.0104.

Bartlett's test suggests that the differences among the SDs is significant.

Since ANOVA assumes populations with equal SDs, you should consider transforming your data (reciprocal or log) or selecting a nonparametric test.

Assumption test: Are the data sampled from Gaussian distributions?

ANOVA assumes that the data are sampled from populations that follow Gaussian distributions. This assumption is tested using the method Kolmogorov and Smirnov:

| Group  | KS     | P Value | Passed normality test? |
|--------|--------|---------|------------------------|
| wt wt  | 0.5132 | <0.0001 | No                     |
| wt Ko  | 0.3224 | 0.0076  | No                     |
| het wt | 0.2103 | >0.10   | Yes                    |
| het KO | 0.2531 | >0.10   | Yes                    |

At least one column failed the normality test with P<0.05.  
 Consider using a nonparametric test or transforming the data

(i.e. converting to logarithms or reciprocals).

Intermediate calculations. ANOVA table

| Source of variation          | Degrees of freedom | Sum of squares | Mean square |
|------------------------------|--------------------|----------------|-------------|
| Treatments (between columns) | 3                  | 1901.2         | 633.73      |
| Residuals (within columns)   | 29                 | 7696.2         | 265.38      |
| Total                        | 32                 | 9597.3         |             |

$$F = 2.388 = (MS_{\text{treatment}}/MS_{\text{residual}})$$

Summary of Data

| Group  | Number of Points | Mean   | Standard Deviation | Standard Error of Mean | Median |
|--------|------------------|--------|--------------------|------------------------|--------|
| wt wt  | 8                | 98.305 | 4.794              | 1.695                  | 100.00 |
| wt Ko  | 9                | 88.160 | 16.255             | 5.418                  | 100.00 |
| het wt | 9                | 77.982 | 20.377             | 6.792                  | 86.097 |
| het KO | 7                | 82.548 | 18.706             | 7.070                  | 85.769 |

| Group  | Minimum | Maximum | 95% Confidence Interval |        |
|--------|---------|---------|-------------------------|--------|
|        |         |         | From                    | To     |
| wt wt  | 86.441  | 100.00  | 94.297                  | 102.31 |
| wt Ko  | 59.771  | 100.00  | 75.665                  | 100.65 |
| het wt | 48.242  | 100.00  | 62.319                  | 93.646 |
| het KO | 54.237  | 100.00  | 65.247                  | 99.849 |

\* \* \*
